# Supplementary material for: Digestive Tract Morphology and Gut Microbiota Jointly Determine an Efficient Digestive Strategy in Subterranean Rodents: Plateau Zokor
Source: MDPI journal article supplement (doi:10.3390/ani12162155), 2022-08-22
Supplement: s1 [file s1]

## Supplementary Materials

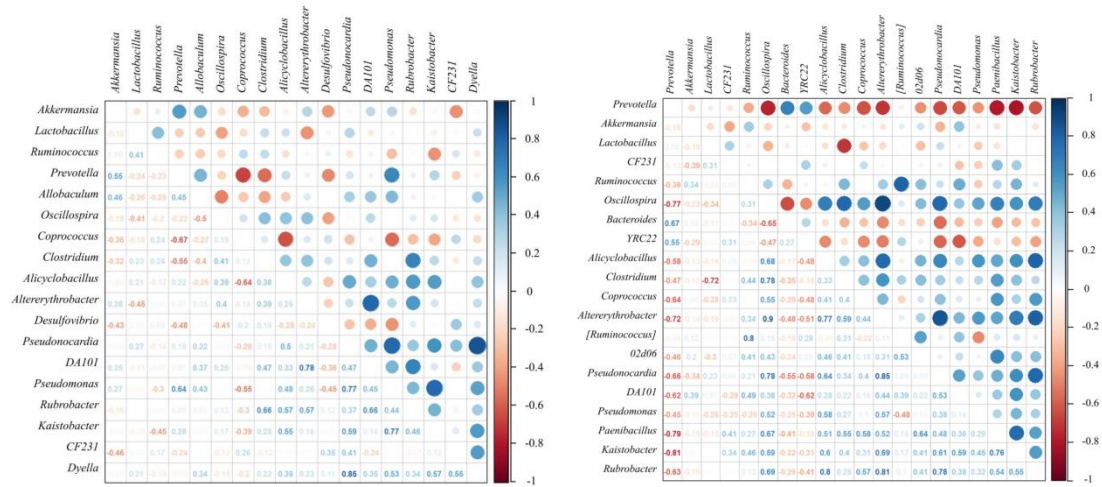

**Figure S1.** The co-occurrence patterns among the 18 core genera across the 11 samples of Plateau zokors (left), and the 20 core genera across the 12 samples of SD rats (right). Co-occurrence patterns were determined by the Spearman's rank correlation analysis. Correlation coefficient is displayed at the bottom left.

**Table S1.** Host species (plateau zokors / laboratory rats) information corresponding to the sample source.

|                | Species                  | ID  | Sex    | Weight (g) |
|----------------|--------------------------|-----|--------|------------|
| plateau zokor  | <i>Eospalax baileyi</i>  | Z1  | female | 216.88     |
| plateau zokor  | <i>Eospalax baileyi</i>  | Z2  | male   | 223.66     |
| plateau zokor  | <i>Eospalax baileyi</i>  | Z3  | male   | 215.09     |
| plateau zokor  | <i>Eospalax baileyi</i>  | Z4  | female | 229.78     |
| plateau zokor  | <i>Eospalax baileyi</i>  | Z5  | female | 216.09     |
| plateau zokor  | <i>Eospalax baileyi</i>  | Z6  | female | 201.24     |
| plateau zokor  | <i>Eospalax baileyi</i>  | Z7  | male   | 222.48     |
| plateau zokor  | <i>Eospalax baileyi</i>  | Z8  | female | 253.2      |
| plateau zokor  | <i>Eospalax baileyi</i>  | Z9  | male   | 236.86     |
| plateau zokor  | <i>Eospalax baileyi</i>  | Z10 | male   | 235.14     |
| plateau zokor  | <i>Eospalax baileyi</i>  | Z11 | female | 252.37     |
| plateau zokor  | <i>Eospalax baileyi</i>  | Z12 | male   | 187.95     |
| laboratory rat | <i>Rattus norvegicus</i> | R1  | male   | 213.5      |
| laboratory rat | <i>Rattus norvegicus</i> | R2  | female | 195.99     |
| laboratory rat | <i>Rattus norvegicus</i> | R3  | female | 228.41     |
| laboratory rat | <i>Rattus norvegicus</i> | R4  | female | 197.5      |
| laboratory rat | <i>Rattus norvegicus</i> | R5  | male   | 196.34     |
| laboratory rat | <i>Rattus norvegicus</i> | R6  | female | 232.82     |
| laboratory rat | <i>Rattus norvegicus</i> | R7  | female | 238.15     |
| laboratory rat | <i>Rattus norvegicus</i> | R8  | male   | 216.42     |
| laboratory rat | <i>Rattus norvegicus</i> | R9  | male   | 224.18     |
| laboratory rat | <i>Rattus norvegicus</i> | R10 | male   | 234.97     |
| laboratory rat | <i>Rattus norvegicus</i> | R11 | male   | 238.15     |
| laboratory rat | <i>Rattus norvegicus</i> | R12 | female | 189.04     |

Note: Host species (plateau zokors / laboratory rats) information corresponding to the sample source. Z01-Z11 means zokor 01-11, SD01-SD12 means laboratory rat 01-11. The weight is the original weight before experiment.

**Table S2.** The nutrient information of Rat Maintenance Feed in the experiment.

| Testitem      | Testing date (g / kg) | Sample size | Test reference |
|---------------|-----------------------|-------------|----------------|
| Crude protein | 221.5±20.0            | 6           | GB/T 6432-1994 |
| Crude fat     | 43.6±3.0              | 6           | GB/T 6433-2006 |
| Crude fiber   | 36.9±4.4              | 6           | GB/T 6434-2006 |
| Moisture      | 81.3±14.8             | 6           | GB/T 6435-2006 |
| Calcium       | 11.4±0.6              | 6           | GB/T 6436-2002 |
| Phosphorus    | 8.3±0.8               | 6           | GB/T 6437-2002 |
| Crude ash     | 68.6±2.4              | 6           | GB/T 6438-2007 |

**Table S3.** The difference statistical analysis of relative abundance of target gene copies for specific species (% of total bacterial 16SrRNA gene) between plateau zokors and laboratory rats at Class level.

| Class level    | <i>Myospalax baileyi</i> | <i>Rattus norvegicus</i> | ANOVA (df=1) |       | Sample size<br>n1, n2 |
|----------------|--------------------------|--------------------------|--------------|-------|-----------------------|
|                |                          |                          | F            | P     |                       |
| Actinobacteria | 2.673±0.731              | 1.648±0.488              | 15.882       | 0.001 | 11, 12                |
| Flavobacteriia | 0.313±0.113              | 0.197±0.076              | 8.337        | 0.009 | 11, 12                |
| 4C0d-2         | 0.061±0.035              | 0.013±0.015              | 18.801       | 0.000 | 11, 12                |
| Nitrospira     | 0.034±0.020              | 0.015±0.017              | 5.685        | 0.026 | 11, 12                |
| TM7-1          | 0.057±0.031              | 0.025±0.017              | 8.972        | 0.006 | 11, 12                |
| Mollicutes     | 0.174±0.087              | 0.731±0.316              | 31.841       | 0.000 | 11, 12                |
| Deinococci     | 0.010±0.008              | 0.003±0.006              | 4.307        | 0.050 | 11, 12                |

Note: n1 represents the sample size of *Myospalax baileyi*, n2 represents the sample size of *Rattus norvegicus*.

**Table S4.** The difference statistical analysis of relative abundance of target gene copies for specific species (% of total bacterial 16SrRNA gene) between plateau zokors and laboratory rats at Order level.

| Order level       | <i>Myospalax baileyi</i> | <i>Rattus norvegicus</i> | ANOVA (df=1) |       | Sample size<br>n1, n2 |
|-------------------|--------------------------|--------------------------|--------------|-------|-----------------------|
|                   |                          |                          | F            | P     |                       |
| RB41              | 0.167±0.088              | 0.107±0.043              | 4.412        | 0.047 | 11, 12                |
| Actinomycetales   | 2.402±0.674              | 1.499±0.438              | 14.732       | 0.001 | 11, 12                |
| Bifidobacteriales | 0.082±0.092              | 0.002±0.005              | 8.906        | 0.007 | 11, 12                |
| Flavobacteriales  | 0.313±0.113              | 0.197±0.076              | 8.337        | 0.008 | 11, 12                |
| YS2               | 0.061±0.035              | 0.013±0.015              | 18.801       | 0.000 | 11, 12                |
| Nitrospirales     | 0.034±0.020              | 0.015±0.017              | 5.685        | 0.026 | 11, 12                |
| Enterobacteriales | 0.062±0.036              | 0.031±0.023              | 6.184        | 0.021 | 11, 12                |
| PYR10d3           | 0.104±0.052              | 0.069±0.023              | 4.421        | 0.047 | 11, 12                |
| RF39              | 0.162±0.086              | 0.697±0.297              | 32.976       | 0.000 | 11, 12                |
| Deinococcales     | 0.010±0.008              | 0.003±0.006              | 4.307        | 0.050 | 11, 12                |

Note: n1 represents the sample size of *Myospalax baileyi*, n2 represents the sample size of *Rattus norvegicus*.

**Table S5.** The difference statistical analysis of relative abundance of target gene copies for specific species (% of total bacterial 16SrRNA gene) between Plateau zokors and laboratory rats at Family level.

| Family level          | <i>Myospalax baileyi</i> | <i>Rattus norvegicus</i> | ANOVA (df=1) |       | Sample size<br>n1, n2 |
|-----------------------|--------------------------|--------------------------|--------------|-------|-----------------------|
|                       |                          |                          | F            | P     |                       |
| Corynebacteriaceae    | 0.002±0.008              | 0.051±0.071              | 4.931        | 0.037 | 11, 12                |
| Frankiaceae           | 0.104±0.036              | 0.060±0.033              | 9.239        | 0.006 | 11, 12                |
| Microbacteriaceae     | 0.207±0.066              | 0.144±0.057              | 6.022        | 0.022 | 11, 12                |
| Pseudonocardiaceae    | 0.264±0.089              | 0.184±0.060              | 6.463        | 0.018 | 11, 12                |
| Bifidobacteriaceae    | 0.082±0.092              | 0.002±0.005              | 8.906        | 0.007 | 11, 12                |
| Bacteroidaceae        | 0.023±0.025              | 1.236±0.917              | 19.123       | 0.000 | 11, 12                |
| Porphyromonadaceae    | 0.044±0.036              | 0.137±0.120              | 6.056        | 0.022 | 11, 12                |
| Prevotellaceae        | 1.632±1.529              | 21.597±14.800            | 19.675       | 0.000 | 11, 12                |
| RF16                  | 0.003±0.008              | 0.089±0.108              | 6.886        | 0.015 | 11, 12                |
| S24-7                 | 34.241±8.318             | 14.005±6.064             | 45.007       | 0.000 | 11, 12                |
| [Odoribacteraceae]    | 0                        | 0.027±0.028              | 10.639       | 0.003 | 11, 12                |
| [Paraprevotellaceae]  | 0.153±0.133              | 3.218±2.813              | 12.979       | 0.001 | 11, 12                |
| Flavobacteriaceae     | 0.291±0.099              | 0.179±0.065              | 10.134       | 0.004 | 11, 12                |
| Paenibacillaceae      | 0.054±0.035              | 0.140±0.122              | 4.998        | 0.036 | 11, 12                |
| Planococcaceae        | 0.060±0.031              | 0.034±0.017              | 6.352        | 0.019 | 11, 12                |
| Turicibacteraceae     | 0.002±0.005              | 0.090±0.072              | 16.344       | 0.001 | 11, 12                |
| Peptostreptococcaceae | 0.022±0.057              | 0.110±0.080              | 8.852        | 0.007 | 11, 12                |
| Ruminococcaceae       | 5.444±2.172              | 8.589±2.627              | 9.679        | 0.005 | 11, 12                |
| Veillonellaceae       | 0.010±0.014              | 0.456±0.446              | 10.941       | 0.003 | 11, 12                |
| [Mogibacteriaceae]    | 0.040±0.033              | 0.095±0.048              | 9.554        | 0.005 | 11, 12                |
| Gemmatimonadaceae     | 0.008±0.011              | 0                        | 7.461        | 0.012 | 11, 12                |
| Nitrospiraceae        | 0.029±0.020              | 0.007±0.008              | 11.448       | 0.002 | 11, 12                |
| Isosphaeraceae        | 0.466±0.174              | 0.328±0.125              | 4.819        | 0.039 | 11, 12                |
| Erythrobacteraceae    | 0.605±0.186              | 0.440±0.160              | 5.167        | 0.033 | 11, 12                |
| Comamonadaceae        | 0.212±0.083              | 0.140±0.058              | 5.799        | 0.025 | 11, 12                |
| Enterobacteriaceae    | 0.062±0.036              | 0.031±0.023              | 6.184        | 0.021 | 11, 12                |
| Sinobacteraceae       | 0.034±0.018              | 0.021±0.012              | 4.468        | 0.046 | 11, 12                |
| Deinococcaceae        | 0.010±0.008              | 0.003±0.006              | 4.307        | 0.050 | 11, 12                |

Note: n1 represents the sample size of *Myospalax baileyi*, n2 represents the sample size of *Rattus norvegicus*.
